# Supplementary material for: Native lignin extraction from soft- and hardwood by green and benign sub/supercritical fluid extraction methodologies
Source: Royal Society of Chemistry journal article supplement (doi:10.1039/d3ra01873c), 2023-01-01

## Native lignin extraction from soft- and hardwood by green and benign sub/supercritical fluid extraction methodologies –Supplementary Information (SI)

Federica Nardella <sup>a†</sup>, Jens Prothmann <sup>b†</sup>, Margareta Sandahl <sup>b</sup>, Peter, Spégel<sup>b</sup>, Erika Ribechini <sup>a</sup>, and Charlotta Turner <sup>\*b</sup>

<sup>1</sup> Department of Chemistry and Industrial Chemistry, University of Pisa, Via G. Moruzzi 13, 56124, Pisa, Italy

<sup>2</sup> Lund University, Department of Chemistry, Centre for Analysis and Synthesis, Lund, Sweden

<sup>†</sup> Both authors contributed equally

\* Corresponding author. [Charlotta.Turner@chem.lu.se](mailto:Charlotta.Turner@chem.lu.se)

### Content

|                                                                                                                                                                                                                                                                                                                                                                               |    |
|-------------------------------------------------------------------------------------------------------------------------------------------------------------------------------------------------------------------------------------------------------------------------------------------------------------------------------------------------------------------------------|----|
| <b>Table S1.</b> Values for the studied variables set (temperature, CO <sub>2</sub> ratio and water content in the co-solvent) for the 11 experiments performed as part of the DOE. The run order was randomised.....                                                                                                                                                         | 3  |
| <b>Table S2.</b> Settings to create the feature list in MZmine 2.....                                                                                                                                                                                                                                                                                                         | 4  |
| <b>Table S3.</b> Hansen solubility parameters, including dispersive interactions ( $\delta D$ ), polar interactions ( $\delta P$ ), hydrogen bonds ( $\delta H$ ), and relative energy difference related to lignin (RED) for several green solvents (Hansen, 2007). .....                                                                                                    | 5  |
| <b>Table S4.</b> Hansen solubility parameters, including dispersive interactions ( $\delta D$ ), polar interactions ( $\delta P$ ) and hydrogen bonds ( $\delta H$ ), for solvent mixtures at the experimental condition in the DOE design space for ethanol and ethyl lactate. RED =Relative energy difference related to lignin; EtOH = ethanol, ELac = ethyl lactate. .... | 6  |
| <b>Table S5.</b> Gravimetric yields obtained for both oak and fir extracted with the three investigated solvents. The yield was calculated as % dry extract weight obtained/ initial sample weight, w/w. CP = centre point. Run order was randomised. ....                                                                                                                    | 7  |
| <b>Figure S1.</b> Softwood (fir) coefficient plot and contour plots obtained from the DOE for ethyl lactate, showing the effect of CO <sub>2</sub> ratio and water content in the co-solvent on the gravimetric yield. Model obtained for other solvents were invalid. ....                                                                                                   | 8  |
| <b>Table S6.</b> Model fit of the data obtained for all the DOE performed and different responses. R <sup>2</sup> is the percent of the variation of the response explained by the model. Q <sup>2</sup> is the percent of the variation of the response predicted by the model according to cross validation. ....                                                           | 9  |
| <b>Table S7.</b> ANOVA results comparing the gravimetric yields obtained by the center points of each DoE, which were performed as triplicates. ....                                                                                                                                                                                                                          | 11 |
| <b>Table S8.</b> ANOVA results comparing the number of detected compounds obtained by the center points of each DoE, which were performed as triplicates.....                                                                                                                                                                                                                 | 12 |
| <b>Table S9.</b> Results from comparison of the slopes obtained by plotting predicted vs observed values with the slope of 1 for each DoE of gravimetric yield. ....                                                                                                                                                                                                          | 13 |
| <b>Table S10.</b> Results from comparison of the slopes obtained by plotting predicted vs observed values with the slope of 1 for each DoE of number of identified compounds.....                                                                                                                                                                                             | 14 |
| <b>Table S11.</b> Comparison and statistics of standard addition and external calibration curve.....                                                                                                                                                                                                                                                                          | 15 |
| <b>Table S12.</b> Calibration curves obtained by linear regression using standards of LMs. ....                                                                                                                                                                                                                                                                               | 15 |
| <b>Table S13.</b> Concentration of vanillin, vanillic acid, coniferyl aldehyde, ferulic acid, syringaldehyde, syringic acid and sinapaldehyde obtained in the investigated extracts. Being a softwood, fir wood does not contain                                                                                                                                              |    |

|                                                                                                                                                                                                                                    |    |
|------------------------------------------------------------------------------------------------------------------------------------------------------------------------------------------------------------------------------------|----|
| syringaldehyde, syringic acid and sinapaldehyde. (<LOD): the concentration was below the LOD of method.<br>.....                                                                                                                   | 16 |
| <b>Figure S2.</b> Coefficient plots and respective contour plots showing the influence of the investigated factors on the sinapaldehyde concentration ( $\mu\text{g/g}$ ) of oak and fir wood. ....                                | 18 |
| <b>Figure S3.</b> Base peak ion chromatogram of the lignin extracted from oak wood obtained with UHPSFC/ESI-HRMS.....                                                                                                              | 19 |
| <b>Figure S4.</b> Loading plot of the KMD-PCA-QDA classification model for lignin dimers showing the latent variables (LVs) 1 and 3. #C = number of carbon atoms, #H = number of hydrogen atoms, #O = number of oxygen atoms. .... | 20 |

**Table S1.** Values for the studied variables set (temperature, CO<sub>2</sub> ratio and water content in the co-solvent) for the 11 experiments performed as part of the DOE. The run order was randomised.

|                           | <b>T (°C)</b> | <b>CO<sub>2</sub> ratio (vol%)</b> | <b>Water content in co-solvent (vol%)</b> |
|---------------------------|---------------|------------------------------------|-------------------------------------------|
| <b>Centre point (n=3)</b> | 60            | 50                                 | 10                                        |
| <b>Experiment 1</b>       | 40            | 10                                 | 0                                         |
| <b>Experiment 2</b>       | 80            | 10                                 | 0                                         |
| <b>Experiment 3</b>       | 40            | 90                                 | 0                                         |
| <b>Experiment 4</b>       | 80            | 90                                 | 0                                         |
| <b>Experiment 5</b>       | 40            | 10                                 | 20                                        |
| <b>Experiment 6</b>       | 80            | 10                                 | 20                                        |
| <b>Experiment 7</b>       | 40            | 90                                 | 20                                        |
| <b>Experiment 8</b>       | 80            | 90                                 | 20                                        |

**Table S2.** Settings to create the feature list in MZmine 2.

1. Raw data methods/Peak detection

1.1 Mass detection

Settings:

- Polarity: negative
- Mass detector: centroid
- Spectrum type: any
- Noise level: 1.0E4

1.2 Chromatogram builder

Settings:

- MS level: 1
- Polarity: negative
- Spectrum type: any
- Min time span: 0.03 min
- Min height: 3.0E4
- m/z tolerance: 0.01 Da or 5.0 ppm

2. Peak list methods

2.1 Peak detection/chromatogram deconvolution

Settings:

- Algorithm: local minimum search
- Chromatographic threshold: 30.0%
- Minimum relative height: 1.0%
- Minimum absolute height: 1.0E4
- Min ratio of peak top/edge 2
- m/z center calculation: median

2.2 Isotopes/isotopes peak grouper

Settings:

- m/z tolerance: 0.01 Da or 10.0 ppm
- Retention time tolerance: 0.05 min
- Maximum charge: 1
- Representative isotope: most intense

2.3 Identification/adduct search

Settings:

- Retention time tolerance: 0.05 min
- Adducts: [M+NH<sub>3</sub>], 17.0265 Da; [M+H<sub>3</sub>PO<sub>4</sub>], 97.9769 Da; [M+H<sub>2</sub>SO<sub>4</sub>], 97.9674; [M+CH<sub>2</sub>O<sub>2</sub>], 46.0056
- m/z tolerance: 0.01 Da or 5 ppm
- Max relative adduct peak height: 50.0%

2.4 Identification/formula prediction

Settings:

- Charge: 1
- Ionisation type: [M-H]<sup>-</sup>
- m/z tolerance: 0.005 Da or 5.0 ppm
- Max best formulas per peak: 1
- Elements: C, O, H, S (for all min: 0, max: 100)
- Element count heuristics: H/C ratio: yes, multiple element counts: yes
- RDBE restrictions: RDBE range: -1 to 40, RDBE must be an integer: yes

**Table S3.** Hansen solubility parameters, including dispersive interactions ( $\delta D$ ), polar interactions ( $\delta P$ ), hydrogen bonds ( $\delta H$ ), and relative energy difference related to lignin (RED) for several green solvents (Hansen, 2007).

|                           | $\delta D$ (MPa <sup>1/2</sup> ) | $\delta P$ (MPa <sup>1/2</sup> ) | $\delta H$ (MPa <sup>1/2</sup> ) | RED | Condition      |
|---------------------------|----------------------------------|----------------------------------|----------------------------------|-----|----------------|
| CO <sub>2</sub>           | 13.2                             | 4.9                              | 5.4                              | 1.7 | 25 °C, 350 bar |
| Water                     | 15.5                             | 16.0                             | 42.3                             | 2.1 | Ambient        |
| Methanol                  | 15.1                             | 12.3                             | 22.3                             | 1.1 | Ambient        |
| Ethanol                   | 15.8                             | 8.8                              | 19.4                             | 1.0 | Ambient        |
| 1-butanol                 | 16.0                             | 5.7                              | 15.8                             | 1.1 | Ambient        |
| Ethyl acetate             | 15.8                             | 5.3                              | 7.2                              | 1.3 | Ambient        |
| Isopropyl acetate         | 14.9                             | 4.5                              | 8.2                              | 1.4 | Ambient        |
| Ethyl lactate             | 16.0                             | 7.6                              | 12.5                             | 1.0 | Ambient        |
| Acetone                   | 15.5                             | 10.4                             | 7.0                              | 1.2 | Ambient        |
| Ethylene glycol           | 17.0                             | 11.0                             | 26                               | 1.0 | Ambient        |
| Anisole                   | 17.8                             | 4.1                              | 6.7                              | 1.2 | Ambient        |
| MEK (methyl ethyl ketone) | 16.0                             | 9.0                              | 5.1                              | 1.3 | Ambient        |

**Table S4.** Hansen solubility parameters, including dispersive interactions ( $\delta D$ ), polar interactions ( $\delta P$ ) and hydrogen bonds ( $\delta H$ ), for solvent mixtures at the experimental condition in the DOE design space for ethanol and ethyl lactate. RED =Relative energy difference related to lignin; EtOH = ethanol, ELac = ethyl lactate.

|                                                            | $\delta D$ (MPa <sup>1/2</sup> ) | $\delta P$ (MPa <sup>1/2</sup> ) | $\delta H$ (MPa <sup>1/2</sup> ) | RED | Condition      |
|------------------------------------------------------------|----------------------------------|----------------------------------|----------------------------------|-----|----------------|
| CO <sub>2</sub> /EtOH/H <sub>2</sub> O (50/45/5, v/v/v)    | 13.0                             | 6.8                              | 12.7                             | 1.4 | 60 °C, 350 bar |
| CO <sub>2</sub> /EtOH (10/90, v/v)                         | 15.1                             | 8.2                              | 17.6                             | 1.1 | 40 °C, 350 bar |
| CO <sub>2</sub> /EtOH (10/90, v/v)                         | 13.9                             | 7.6                              | 16.2                             | 1.3 | 80 °C, 350 bar |
| CO <sub>2</sub> /EtOH (90/10, v/v)                         | 12.7                             | 5.1                              | 6.6                              | 1.7 | 40 °C, 350 bar |
| CO <sub>2</sub> /EtOH (90/10, v/v)                         | 10.4                             | 4.7                              | 5.8                              | 2.0 | 80 °C, 350 bar |
| CO <sub>2</sub> /EtOH/ H <sub>2</sub> O (10/72/18, v/v/v)  | 15.1                             | 9.5                              | 21.6                             | 1.1 | 40 °C, 350 bar |
| CO <sub>2</sub> /EtOH/ H <sub>2</sub> O (10/72/18, v/v/v)  | 13.9                             | 8.9                              | 20.3                             | 1.2 | 80 °C, 350 bar |
| CO <sub>2</sub> /EtOH/ H <sub>2</sub> O (90/8/2, v/v/v)    | 12.7                             | 5.3                              | 7.0                              | 1.7 | 40 °C, 350 bar |
| CO <sub>2</sub> /EtOH/ H <sub>2</sub> O (90/8/2, v/v/v)    | 10.4                             | 4.9                              | 6.3                              | 2.0 | 80 °C, 350 bar |
| CO <sub>2</sub> /EtLac/H <sub>2</sub> O (50/45/5, v/v/v)   | 13.2                             | 6.3                              | 9.9                              | 1.5 | 60 °C, 350 bar |
| CO <sub>2</sub> /EtLac (10/90, v/v)                        | 15.4                             | 7.2                              | 11.6                             | 1.1 | 40 °C, 350 bar |
| CO <sub>2</sub> /EtLac (10/90, v/v)                        | 14.4                             | 6.8                              | 10.9                             | 1.3 | 80 °C, 350 bar |
| CO <sub>2</sub> /EtLac (90/10, v/v)                        | 12.7                             | 5.0                              | 5.9                              | 1.7 | 40 °C, 350 bar |
| CO <sub>2</sub> /EtLac (90/10, v/v)                        | 10.5                             | 4.6                              | 5.2                              | 2.0 | 80 °C, 350 bar |
| CO <sub>2</sub> /EtLac/ H <sub>2</sub> O (10/72/18, v/v/v) | 15.3                             | 8.7                              | 16.9                             | 1.0 | 40 °C, 350 bar |
| CO <sub>2</sub> /EtLac/ H <sub>2</sub> O (10/72/18, v/v/v) | 14.4                             | 8.2                              | 16.0                             | 1.2 | 80 °C, 350 bar |
| CO <sub>2</sub> /EtLac/ H <sub>2</sub> O (90/8/2, v/v/v)   | 12.7                             | 5.2                              | 6.5                              | 1.7 | 40 °C, 350 bar |
| CO <sub>2</sub> /EtLac/ H <sub>2</sub> O (90/8/2, v/v/v)   | 10.5                             | 4.8                              | 5.8                              | 2.0 | 80 °C, 350 bar |

**Table S5.** Gravimetric yields obtained for both oak and fir extracted with the three investigated solvents. The yield was calculated as % dry extract weight obtained/ initial sample weight, w/w. CP = centre point. Run order was randomised.

|                     | Ethanol |         | Acetone |         | Ethyl lactate |         |
|---------------------|---------|---------|---------|---------|---------------|---------|
|                     | Oak (%) | Fir (%) | Oak (%) | Fir (%) | Oak (%)       | Fir (%) |
| <b>CP (average)</b> | 3.1     | 0.9     | 4.3     | 1.3     | 5.3           | 2.2     |
| <b>Experiment 1</b> | 5.5     | 0.9     | 5.2     | 1.0     | 9.1           | 5.3     |
| <b>Experiment 2</b> | 7.8     | 1.1     | 5.6     | 0.9     | 8.5           | 6.0     |
| <b>Experiment 3</b> | 0.3     | 0.7     | 0.3     | 0.7     | 7.4           | 3.0     |
| <b>Experiment 4</b> | 0.5     | 0.8     | 0.4     | 0.7     | 0.4           | 3.1     |
| <b>Experiment 5</b> | 8.0     | 1.1     | 9.1     | 11.0    | 11.3          | 1.9     |
| <b>Experiment 6</b> | 10.0    | 2.6     | 13.1    | 1.7     | 17.5          | 3.7     |
| <b>Experiment 7</b> | 3.5     | 0.8     | 0.4     | 0.9     | 0.3           | 1.6     |
| <b>Experiment 8</b> | 2.3     | 0.9     | 1.1     | 0.7     | 3.5           | 1.7     |

**Figure S1.** Softwood (fir) coefficient plot and contour plots obtained from the DOE for ethyl lactate, showing the effect of CO<sub>2</sub> ratio and water content in the co-solvent on the gravimetric yield. Model obtained for other solvents were invalid.

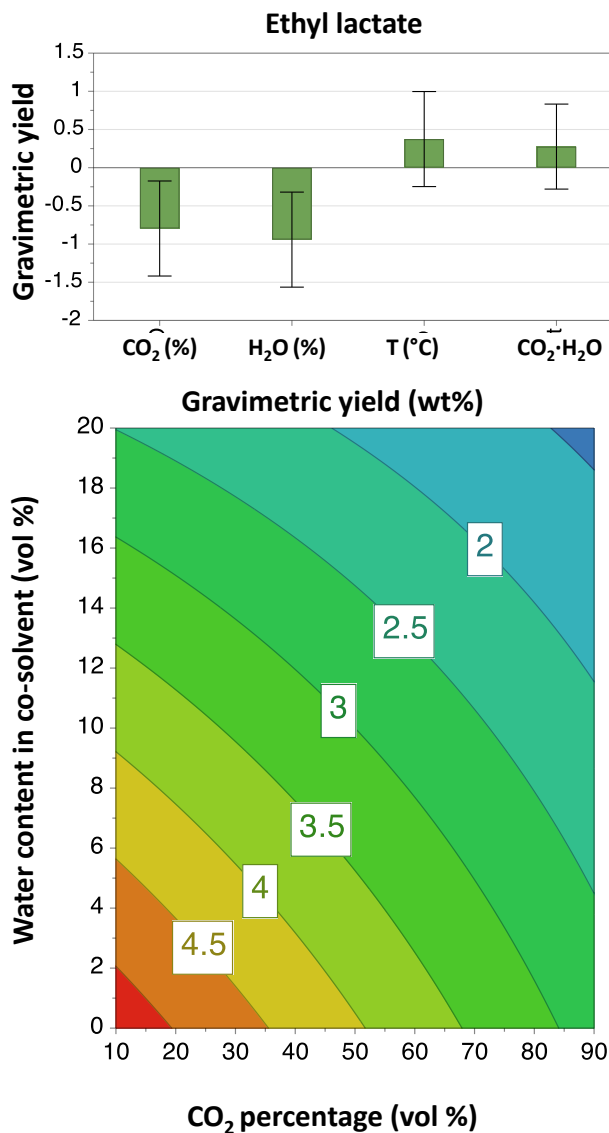

*Figure S1 - Coefficient plots from the interaction model with a full factorial design showing the influence of the investigated factors and two-factor interactions on the gravimetric yield and contour plots showing the influence of the CO<sub>2</sub> percentage and water content in the co-solvent on the gravimetric yield of fir wood using ethyl lactate as co-solvent. CO<sub>2</sub> (%): CO<sub>2</sub> percentage; H<sub>2</sub>O (%): water content in co-solvent. Temperature was 60 °C and pressure 350 bar.*



**Table S6.** Model fit of the data obtained for all the DOE performed and different responses.  $R^2$  is the percent of the variation of the response explained by the model.  $Q^2$  is the percent of the variation of the response predicted by the model according to cross validation.

| Gravimetric yield (wt%)                              |         |       |         |       |               |      |
|------------------------------------------------------|---------|-------|---------|-------|---------------|------|
|                                                      | Ethanol |       | Acetone |       | Ethyl lactate |      |
|                                                      | Oak     | Fir   | Oak     | Fir   | Oak           | Fir  |
| $R^2$                                                | 0.86    | 0.64  | 0.97    | 0.63  | 0.91          | 0.82 |
| $Q^2$                                                | 0.60    | 0.23  | 0.73    | 0.07  | 0.48          | 0.58 |
| $R^2-Q^2$                                            | 0.26    | 0.41  | 0.24    | 0.56  | 0.43          | 0.24 |
| Reproducibility                                      | 0.78    | 0.54  | 1.00    | 1.00  | 0.97          | 0.94 |
| Number of identified compounds                       |         |       |         |       |               |      |
|                                                      | Ethanol |       | Acetone |       | Ethyl lactate |      |
|                                                      | Oak     | Fir   | Oak     | Fir   | Oak           | Fir  |
| $R^2$                                                | 0.46    | 0.55  | 0.22    | 0.20  | 0.66          | 0.64 |
| $Q^2$                                                | -0.19   | 0.30  | -0.13   | -0.20 | 0.39          | 0.39 |
| $R^2-Q^2$                                            | 0.66    | 0.24  | 0.35    | 0.40  | 0.26          | 0.26 |
| Reproducibility                                      | 0.43    | -0.20 | 0.60    | 0.42  | 0.97          | 0.08 |
| Vanillin concentration ( $\mu\text{g/g}$ )           |         |       |         |       |               |      |
|                                                      | Ethanol |       | Acetone |       | Ethyl lactate |      |
|                                                      | Oak     | Fir   | Oak     | Fir   | Oak           | Fir  |
| $R^2$                                                | 0.50    | 0.85  | 0.33    | 0.24  | 0.94          | 0.70 |
| $Q^2$                                                | -0.20   | 0.18  | -0.11   | -0.20 | 0.46          | 0.01 |
| $R^2-Q^2$                                            | 0.70    | 0.68  | 0.44    | 0.44  | 0.49          | 0.69 |
| Reproducibility                                      | 0.97    | 0.83  | -0.20   | 0.95  | 0.94          | 0.53 |
| Vanillic acid concentration ( $\mu\text{g/g}$ )      |         |       |         |       |               |      |
|                                                      | Ethanol |       | Acetone |       | Ethyl lactate |      |
|                                                      | Oak     | Fir   | Oak     | Fir   | Oak           | Fir  |
| $R^2$                                                | 0.59    | 0.69  | 0.42    | 0.67  | 0.87          | 0.72 |
| $Q^2$                                                | -0.01   | 0.17  | 0.06    | -0.07 | 0.28          | 0.13 |
| $R^2-Q^2$                                            | 0.60    | 0.52  | 0.35    | 0.74  | 0.59          | 0.59 |
| Reproducibility                                      | 0.88    | 0.68  | -0.20   | 0.89  | 0.73          | 0.92 |
| Coniferyl aldehyde concentration ( $\mu\text{g/g}$ ) |         |       |         |       |               |      |
|                                                      | Ethanol |       | Acetone |       | Ethyl lactate |      |
|                                                      | Oak     | Fir   | Oak     | Fir   | Oak           | Fir  |
| $R^2$                                                | 0.74    | 0.46  | 0.65    | 0.23  | 0.91          | 0.86 |
| $Q^2$                                                | 0.20    | 0.26  | 0.10    | -0.20 | 0.41          | 0.37 |
| $R^2-Q^2$                                            | 0.54    | 0.20  | 0.56    | 0.43  | 0.50          | 0.49 |
| Reproducibility                                      | 0.39    | -0.20 | 0.83    | 0.92  | 0.55          | 0.37 |
| Ferulic acid concentration ( $\mu\text{g/g}$ )       |         |       |         |       |               |      |
|                                                      | Ethanol |       | Acetone |       | Ethyl lactate |      |
|                                                      | Oak     | Fir   | Oak     | Fir   | Oak           | Fir  |
| $R^2$                                                | 0.36    | 0.35  | 0.20    | 0.93  | 0.52          | 0.81 |
| $Q^2$                                                | 0.30    | -0.16 | -0.20   | 0.28  | -0.03         | 0.27 |
| $R^2-Q^2$                                            | 0.07    | 0.51  | 0.40    | 0.65  | 0.55          | 0.53 |
| Reproducibility                                      | -0.20   | -0.20 | 1.00    | 1.00  | 0.17          | 0.80 |

| <b>Syringaldehyde concentration (<math>\mu\text{g/g}</math>)</b> |                |                |                      |
|------------------------------------------------------------------|----------------|----------------|----------------------|
|                                                                  | <b>Ethanol</b> | <b>Acetone</b> | <b>Ethyl lactate</b> |
|                                                                  | <b>Oak</b>     | <b>Oak</b>     | <b>Oak</b>           |
| <b>R<sup>2</sup></b>                                             | 0.34           | 0.77           | 0.77                 |
| <b>Q<sup>2</sup></b>                                             | -0.20          | 0.57           | 0.45                 |
| <b>R<sup>2</sup>-Q<sup>2</sup></b>                               | 0.54           | 0.20           | 0.32                 |
| <b>Reproducibility</b>                                           | -0.14          | 0.90           | 1.00                 |

  

| <b>Syringic acid concentration (<math>\mu\text{g/g}</math>)</b> |                |                |                      |
|-----------------------------------------------------------------|----------------|----------------|----------------------|
|                                                                 | <b>Ethanol</b> | <b>Acetone</b> | <b>Ethyl lactate</b> |
|                                                                 | <b>Oak</b>     | <b>Oak</b>     | <b>Oak</b>           |
| <b>R<sup>2</sup></b>                                            | 0.64           | 0.28           | 0.09                 |
| <b>Q<sup>2</sup></b>                                            | 0.20           | -0.19          | -0.20                |
| <b>R<sup>2</sup>-Q<sup>2</sup></b>                              | 0.44           | 0.47           | 0.29                 |
| <b>Reproducibility</b>                                          | 0.74           | 0.09           | -0.20                |

  

| <b>Sinapaldehyde concentration (<math>\mu\text{g/g}</math>)</b> |                |                |                      |
|-----------------------------------------------------------------|----------------|----------------|----------------------|
|                                                                 | <b>Ethanol</b> | <b>Acetone</b> | <b>Ethyl lactate</b> |
|                                                                 | <b>Oak</b>     | <b>Oak</b>     | <b>Oak</b>           |
| <b>R<sup>2</sup></b>                                            | 0.01           | 0.77           | 0.73                 |
| <b>Q<sup>2</sup></b>                                            | -0.14          | 0.44           | 0.33                 |
| <b>R<sup>2</sup>-Q<sup>2</sup></b>                              | 0.15           | 0.32           | 0.40                 |
| <b>Reproducibility</b>                                          | -0.20          | 0.81           | 0.81                 |

**Table S7.** ANOVA results comparing the gravimetric yields obtained by the center points of each DoE, which were performed as triplicates.

| <b>Gravimetric yield (wt%)</b> | <b>Ethanol</b> | <b>Acetone</b> | <b>Ethyl lactate</b> |
|--------------------------------|----------------|----------------|----------------------|
| <b>Oak</b>                     | 1.4            | 4.48           | 4.35                 |
|                                | 3.4            | 4.29           | 5.89                 |
|                                | 4.4            | 4.16           | 5.62                 |
| <b>Fir</b>                     | 0.77           | 1.31           | 2.48                 |
|                                | 0.55           | 1.21           | 1.8                  |
|                                | 1.28           | 1.31           | 2.34                 |

| <b>SUMMARY</b>    | <b>Ethanol</b> | <b>Acetone</b> | <b>Ethyl lactate</b> | <b>Total</b> |
|-------------------|----------------|----------------|----------------------|--------------|
| <b><i>Oak</i></b> |                |                |                      |              |
| <b>Count</b>      | 3              | 3              | 3                    | 9            |
| <b>Sum</b>        | 9.2            | 12.93          | 15.86                | 37.99        |
| <b>Average</b>    | 3.066667       | 4.31           | 5.286667             | 4.221111     |
| <b>Variance</b>   | 2.333333       | 0.0259         | 0.676233             | 1.687386     |

|                   |          |          |          |        |
|-------------------|----------|----------|----------|--------|
| <b><i>Fir</i></b> |          |          |          |        |
| <b>Count</b>      | 3        | 3        | 3        | 9      |
| <b>Sum</b>        | 2.6      | 3.83     | 6.62     | 13.05  |
| <b>Average</b>    | 0.866667 | 1.276667 | 2.206667 | 1.45   |
| <b>Variance</b>   | 0.140233 | 0.003333 | 0.128933 | 0.4217 |

|                     |          |          |          |  |
|---------------------|----------|----------|----------|--|
| <b><i>Total</i></b> |          |          |          |  |
| <b>Count</b>        | 6        | 6        | 6        |  |
| <b>Sum</b>          | 11.8     | 16.76    | 22.48    |  |
| <b>Average</b>      | 1.966667 | 2.793333 | 3.746667 |  |
| <b>Variance</b>     | 2.441427 | 2.772027 | 3.167987 |  |

| <b>ANOVA</b>               |           |           |           |          |                |               |
|----------------------------|-----------|-----------|-----------|----------|----------------|---------------|
| <b>Source of Variation</b> | <b>SS</b> | <b>df</b> | <b>MS</b> | <b>F</b> | <b>P-value</b> | <b>F crit</b> |
| <b>Wood types</b>          | 34.55576  | 1         | 34.55576  | 62.67733 | 4.183E-06      | 4.7472253     |
| <b>Solvents</b>            | 9.521244  | 2         | 4.760622  | 8.634831 | 0.0047488      | 3.8852938     |
| <b>Interaction</b>         | 0.735511  | 2         | 0.367756  | 0.667036 | 0.5312643      | 3.8852938     |
| <b>Within</b>              | 6.615933  | 12        | 0.551328  |          |                |               |
| <b>Total</b>               | 51.42844  | 17        |           |          |                |               |

**Table S8.** ANOVA results comparing the number of detected compounds obtained by the center points of each DoE, which were performed as triplicates.

| <b>Number of identified compounds</b> | <b>Ethanol</b> | <b>Acetone</b> | <b>Ethyl lactate</b> |
|---------------------------------------|----------------|----------------|----------------------|
| <b>Oak</b>                            | 17             | 24             | 18                   |
|                                       | 18             | 39             | 20                   |
|                                       | 11             | 34             | 20                   |
| <b>Fir</b>                            | 20             | 13             | 15                   |
|                                       | 5              | 24             | 7                    |
|                                       | 9              | 20             | 18                   |

| <b>SUMMARY</b>    | <b>Ethanol</b> | <b>Acetone</b> | <b>Ethyl lactate</b> | <b>Total</b> |
|-------------------|----------------|----------------|----------------------|--------------|
| <b><i>Oak</i></b> |                |                |                      |              |
| <b>Count</b>      | 3              | 3              | 3                    | 9            |
| <b>Sum</b>        | 46             | 97             | 58                   | 201          |
| <b>Average</b>    | 15.333333      | 32.333333      | 19.333333            | 22.333333    |
| <b>Variance</b>   | 14.333333      | 58.333333      | 1.333333             | 77.75        |

|                   |           |    |           |           |
|-------------------|-----------|----|-----------|-----------|
| <b><i>Fir</i></b> |           |    |           |           |
| <b>Count</b>      | 3         | 3  | 3         | 9         |
| <b>Sum</b>        | 34        | 57 | 40        | 131       |
| <b>Average</b>    | 11.333333 | 19 | 13.333333 | 14.555556 |
| <b>Variance</b>   | 60.333333 | 31 | 32.333333 | 42.777778 |

|                     |           |           |           |  |
|---------------------|-----------|-----------|-----------|--|
| <b><i>Total</i></b> |           |           |           |  |
| <b>Count</b>        | 6         | 6         | 6         |  |
| <b>Sum</b>          | 80        | 154       | 98        |  |
| <b>Average</b>      | 13.333333 | 25.666667 | 16.333333 |  |
| <b>Variance</b>     | 34.666667 | 89.066667 | 24.266667 |  |

| <b>ANOVA</b>               |           |           |           |          |                |               |
|----------------------------|-----------|-----------|-----------|----------|----------------|---------------|
| <b>Source of Variation</b> | <b>SS</b> | <b>df</b> | <b>MS</b> | <b>F</b> | <b>P-value</b> | <b>F crit</b> |
| <b>Wood types</b>          | 272.2222  | 1         | 272.2222  | 8.263069 | 0.0139711      | 4.7472253     |
| <b>Solvents</b>            | 496.4444  | 2         | 248.2222  | 7.53457  | 0.00759        | 3.8852938     |
| <b>Interaction</b>         | 72.44444  | 2         | 36.22222  | 1.099494 | 0.3643704      | 3.8852938     |
| <b>Within</b>              | 395.3333  | 12        | 32.94444  |          |                |               |
| <b>Total</b>               | 1236.444  | 17        |           |          |                |               |

**Table S9.** Results from comparison of the slopes obtained by plotting predicted vs observed values with the slope of 1 for each DoE of gravimetric yield.

| Gravimetric yield |             |       |             |         |             |       |             |               |             |       |             |      |
|-------------------|-------------|-------|-------------|---------|-------------|-------|-------------|---------------|-------------|-------|-------------|------|
| Ethanol           |             |       |             | Acetone |             |       |             | Ethyl lactate |             |       |             |      |
| Oak               |             | Fir   |             | Oak     |             | Fir   |             | Oak           |             | Fir   |             |      |
|                   | Pred        | Obs   | Pred        | Obs     | Pred        | Obs   | Pred        | Obs           | Pred        | Obs   | Pred        | Obs  |
| Exp 1             | -0.47       | 0.30  | 0.44        | 0.73    | -0.38       | 0.27  | -1.00       | 0.94          | 1.13        | 0.26  | 0.98        | 1.64 |
| Exp 2             | 0.36        | 0.50  | 0.58        | 0.83    | 0.54        | 0.41  | -0.91       | 0.74          | 1.60        | 3.54  | 1.82        | 1.75 |
| Exp 3             | 2.03        | 3.50  | 0.72        | 0.89    | 0.77        | 0.39  | -0.41       | 0.65          | 3.09        | 7.37  | 2.07        | 1.90 |
| Exp 4             | 2.86        | 2.30  | 0.91        | 0.83    | 1.69        | 1.14  | 1.92        | 0.96          | 3.56        | 0.35  | 2.40        | 2.99 |
| Exp 5             | 4.28        | 1.40  | 1.05        | 0.90    | 4.38        | 4.48  | 1.95        | 1.31          | 6.71        | 4.35  | 2.91        | 3.72 |
| Exp 6             | 4.28        | 3.40  | 1.06        | 0.77    | 4.38        | 4.29  | 1.95        | 1.21          | 6.71        | 5.89  | 3.00        | 2.48 |
| Exp 7             | 4.28        | 4.40  | 1.06        | 0.55    | 4.38        | 4.16  | 1.95        | 1.31          | 6.71        | 5.62  | 3.00        | 1.80 |
| Exp 8             | 5.78        | 5.50  | 1.06        | 1.28    | 4.39        | 5.23  | 2.01        | 0.74          | 8.05        | 9.11  | 3.00        | 2.34 |
| CP1               | 6.61        | 7.80  | 1.20        | 1.13    | 5.53        | 5.58  | 2.51        | 0.92          | 8.52        | 8.53  | 3.24        | 3.11 |
| CP2               | 8.13        | 8.00  | 1.55        | 1.13    | 10.66       | 9.11  | 4.28        | 1.66          | 13.61       | 11.27 | 4.87        | 5.27 |
| CP3               | 8.96        | 10.00 | 2.03        | 2.61    | 11.81       | 13.08 | 7.20        | 11.00         | 14.08       | 17.48 | 5.71        | 6.00 |
| Slope             | 1.000000    |       | 0.999999    |         | 1.000002    |       | 1.000000    |               | 0.999997    |       | 1.000000    |      |
| n                 | 11          |       | 11          |         | 11          |       | 11          |               | 11          |       | 11          |      |
| SE (reg)          | 1.28155138  |       | 0.353123537 |         | 0.794891708 |       | 1.98170723  |               | 2.553638349 |       | 0.656485923 |      |
| SE(slope)         | 0.135543709 |       | 0.252758419 |         | 0.064121878 |       | 0.265557111 |               | 0.186672217 |       | 0.15660464  |      |
| Difference        | 1.1E-07     |       | 1.4E-06     |         | 2.3E-06     |       | 2.4E-07     |               | 2.8E-06     |       | 3.2E-07     |      |
| SE (diff)         | 0.135543709 |       | 0.252758419 |         | 0.064121878 |       | 0.265557111 |               | 0.186672217 |       | 0.15660464  |      |
| t-stat            | 7.9E-07     |       | 5.6E-06     |         | 3.5E-05     |       | 9.1E-07     |               | 1.5E-05     |       | 2.0E-06     |      |
| df                | 14          |       | 14          |         | 14          |       | 14          |               | 14          |       | 14          |      |
| p                 | 0.99999938  |       | 0.999995597 |         | 0.999972439 |       | 0.999999284 |               | 0.999988147 |       | 0.999998423 |      |

**Table S10.** Results from comparison of the slopes obtained by plotting predicted vs observed values with the slope of 1 for each DoE of number of identified compounds.

|                   | Number of identified compounds |       |          |       |          |       |          |       |               |       |          |       |
|-------------------|--------------------------------|-------|----------|-------|----------|-------|----------|-------|---------------|-------|----------|-------|
|                   | Ethanol                        |       |          |       | Acetone  |       |          |       | Ethyl lactate |       |          |       |
|                   | Oak                            |       | Fir      |       | Oak      |       | Fir      |       | Oak           |       | Fir      |       |
|                   | Pred                           | Obs   | Pred     | Obs   | Pred     | Obs   | Pred     | Obs   | Pred          | Obs   | Pred     | Obs   |
| Exp 1             | 13.70                          | 8.00  | 6.37     | 5.00  | 14.42    | 8.00  | 7.91     | 2.00  | 10.27         | 9.00  | 5.43     | 4.00  |
| Exp 2             | 9.20                           | 8.00  | 5.25     | 8.00  | 8.52     | 2.00  | 4.99     | 2.00  | 4.77          | 3.00  | 4.83     | 3.00  |
| Exp 3             | 19.20                          | 21.00 | 13.42    | 12.00 | 23.67    | 17.00 | 14.26    | 13.00 | 21.27         | 18.00 | 17.40    | 19.00 |
| Exp 4             | 17.20                          | 21.00 | 7.53     | 8.00  | 10.42    | 7.00  | 12.33    | 8.00  | 10.77         | 8.00  | 9.31     | 11.00 |
| Exp 5             | 12.95                          | 18.00 | 13.72    | 17.00 | 19.36    | 13.00 | 7.80     | 7.00  | 13.27         | 10.00 | 7.31     | 8.00  |
| Exp 6             | 8.45                           | 9.00  | 12.60    | 9.00  | 13.46    | 8.00  | 4.88     | 1.00  | 7.77          | 5.00  | 6.71     | 4.00  |
| Exp 7             | 18.45                          | 16.00 | 20.77    | 22.00 | 28.61    | 24.00 | 14.15    | 9.00  | 24.27         | 23.00 | 19.28    | 16.00 |
| Exp 8             | 16.45                          | 12.00 | 14.88    | 15.00 | 15.36    | 8.00  | 12.22    | 9.00  | 13.77         | 12.00 | 11.19    | 7.00  |
| CP1               | 14.45                          | 17.00 | 11.82    | 20.00 | 16.73    | 24.00 | 9.82     | 13.00 | 13.27         | 18.00 | 10.18    | 15.00 |
| CP2               | 14.45                          | 18.00 | 11.82    | 5.00  | 16.73    | 39.00 | 9.82     | 24.00 | 13.27         | 20.00 | 10.18    | 7.00  |
| CP3               | 14.45                          | 11.00 | 11.82    | 9.00  | 16.73    | 34.00 | 9.82     | 20.00 | 13.27         | 20.00 | 10.18    | 18.00 |
| <b>Slope</b>      | 1.000005                       |       | 1.000002 |       | 1.000005 |       | 1.000000 |       | 1.000001      |       | 1.000000 |       |
| <b>n</b>          | 11                             |       | 11       |       | 11       |       | 11       |       | 11            |       | 11       |       |
| <b>SE (reg)</b>   | 3.86188                        |       | 4.19377  |       | 11.21952 |       | 6.92611  |       | 4.20558       |       | 3.96305  |       |
| <b>SE(slope)</b>  | 0.3578                         |       | 0.3064   |       | 0.6259   |       | 0.6730   |       | 0.2416        |       | 0.2746   |       |
| <b>Difference</b> | 4.55E-06                       |       | 2.17E-06 |       | 5.16E-06 |       | 5.00E-07 |       | 9.36E-07      |       | 2.48E-07 |       |
| <b>SE (diff)</b>  | 0.3578                         |       | 0.3064   |       | 0.6259   |       | 0.6730   |       | 0.2416        |       | 0.2746   |       |
| <b>t-stat</b>     | 1.27E-05                       |       | 7.09E-06 |       | 8.25E-06 |       | 7.42E-07 |       | 3.87E-06      |       | 9.03E-07 |       |
| <b>df</b>         | 14                             |       | 14       |       | 14       |       | 14       |       | 14            |       | 14       |       |
| <b>p</b>          | 0.999990                       |       | 0.999994 |       | 0.999994 |       | 0.999999 |       | 0.999997      |       | 0.999999 |       |

**Table S11.** Comparison and statistics of standard addition and external calibration curve.

|                          | <b>Slope</b> | <b>Slope error</b> | <b>Intercept</b> | <b>Intercept error</b> | <b>t calculated</b> | <b>t listed (<math>\alpha=0.05</math>)</b> |
|--------------------------|--------------|--------------------|------------------|------------------------|---------------------|--------------------------------------------|
| <b>External</b>          | 0.10827      | 0.00154            | -0.00629         | 0.00825                | 1.04                | 2.31                                       |
| <b>Standard addition</b> | 0.09927      | 0.01937            | 0.43518          | 0.11545                |                     |                                            |

**Table S12.** Calibration curves obtained by linear regression using standards of LMs.

| <b>Compound</b>    | <b>Slope</b> | <b>Slope error</b> | <b>Intercept</b> | <b>Intercept error</b> | <b>R<sup>2</sup></b> |
|--------------------|--------------|--------------------|------------------|------------------------|----------------------|
| Vanillin           | 0.108        | 0.00154            | -0.006           | 0.00825                | 0.999                |
| Vanillic acid      | 0.001        | 0.00003            | 0.001            | 0.00062                | 0.998                |
| Coniferyl aldehyde | 0.039        | 0.00112            | 0.008            | 0.02412                | 0.996                |
| Ferulic acid       | 0.053        | 0.00266            | -0.078           | 0.06154                | 0.992                |
| Syringaldehyde     | 0.010        | 0.00026            | -0.008           | 0.00537                | 0.998                |
| Syringic acid      | 0.001        | 0.00003            | -0.001           | 0.00072                | 0.998                |
| Sinapaldehyde      | 0.049        | 0.00180            | -0.054           | 0.03922                | 0.996                |

**Table S13.** Concentration of vanillin, vanillic acid, coniferyl aldehyde, ferulic acid, syringaldehyde, syringic acid and sinapaldehyde obtained in the investigated extracts. Being a softwood, fir wood does not contain syringaldehyde, syringic acid and sinapaldehyde. (<LOD): the concentration was below the LOD of method.

|              | Vanillin   |            |            |            |               |            |
|--------------|------------|------------|------------|------------|---------------|------------|
|              | Ethanol    |            | Acetone    |            | Ethyl lactate |            |
|              | Oak (µg/g) | Fir (µg/g) | Oak (µg/g) | Fir (µg/g) | Oak (µg/g)    | Fir (µg/g) |
| CP (average) | 3.0 ± 1    | 9.0 ± 3    | 16.0 ± 6   | 23.0 ± 2   | 8.0 ± 2       | 15.0 ± 6   |
| Experiment 1 | 6.0        | <LOD       | 6.6        | <LOD       | <LOD          | 6.2        |
| Experiment 2 | 11.0       | 12.5       | 9.5        | <LOD       | 7.3           | <LOD       |
| Experiment 3 | 1.9        | 4.8        | <LOD       | <LOD       | <LOD          | <LOD       |
| Experiment 4 | 7.0        | 16.9       | <LOD       | <LOD       | <LOD          | 3.0        |
| Experiment 5 | 14.3       | <LOD       | 5.6        | 17.6       | 5.3           | 3.3        |
| Experiment 6 | 14.0       | 42.5       | 16.3       | <LOD       | 29.7          | 37.2       |
| Experiment 7 | 83.5       | 7.2        | 5.5        | 8.7        | <LOD          | 6.3        |
| Experiment 8 | 10.8       | 17.0       | 5.9        | 7.9        | 4.7           | 12.6       |

  

|              | Vanillic acid |            |            |            |               |            |
|--------------|---------------|------------|------------|------------|---------------|------------|
|              | Ethanol       |            | Acetone    |            | Ethyl lactate |            |
|              | Oak (µg/g)    | Fir (µg/g) | Oak (µg/g) | Fir (µg/g) | Oak (µg/g)    | Fir (µg/g) |
| CP (average) | 3.0 ± 1       | 5.0 ± 2    | 6.0 ± 2    | 9.0 ± 2    | 6.0 ± 2       | 20.0 ± 3   |
| Experiment 1 | 4.0           | <LOD       | <LOD       | <LOD       | <LOD          | <LOD       |
| Experiment 2 | 4.5           | 22.2       | 3.5        | 0.9        | 8.2           | <LOD       |
| Experiment 3 | <LOD          | <LOD       | <LOD       | <LOD       | <LOD          | <LOD       |
| Experiment 4 | 6.2           | 39.6       | <LOD       | <LOD       | 8.8           | <LOD       |
| Experiment 5 | 22.6          | 25.7       | 3.7        | 18.8       | 7.4           | 15.4       |
| Experiment 6 | 18.6          | 22.1       | 6.3        | <LOD       | 5.4           | 32.5       |
| Experiment 7 | 9.7           | 18.2       | <LOD       | 5.0        | 4.4           | 12.7       |
| Experiment 8 | 3.4           | 37.9       | 2.0        | 4.7        | 8.2           | 11.3       |

  

|              | Coniferyl aldehyde |            |            |            |               |            |
|--------------|--------------------|------------|------------|------------|---------------|------------|
|              | Ethanol            |            | Acetone    |            | Ethyl lactate |            |
|              | Oak (µg/g)         | Fir (µg/g) | Oak (µg/g) | Fir (µg/g) | Oak (µg/g)    | Fir (µg/g) |
| CP (average) | 12.0 ± 6           | 14.0 ± 7   | 8.0 ± 1    | 17.0 ± 3   | 3.0 ± 2       | 7.0 ± 5    |
| Experiment 1 | <LOD               | 4.7        | 3.1        | <LOD       | <LOD          | <LOD       |
| Experiment 2 | 9.8                | 22.6       | 8.1        | 4.1        | <LOD          | <LOD       |
| Experiment 3 | <LOD               | 2.3        | <LOD       | <LOD       | <LOD          | <LOD       |
| Experiment 4 | 3.9                | 16.1       | <LOD       | <LOD       | <LOD          | <LOD       |
| Experiment 5 | 6.8                | 12.8       | 4.2        | 4.2        | 4.3           | 12.7       |
| Experiment 6 | 6.8                | 24.5       | 9.2        | <LOD       | 7.5           | 18.5       |
| Experiment 7 | 13.4               | 15.2       | 2.3        | <LOD       | 2.3           | 6.9        |
| Experiment 8 | <LOD               | 17.6       | 7.8        | 16.2       | 5.1           | 9.2        |

  

|              | Ferulic acid |            |            |            |               |            |
|--------------|--------------|------------|------------|------------|---------------|------------|
|              | Ethanol      |            | Acetone    |            | Ethyl lactate |            |
|              | Oak (µg/g)   | Fir (µg/g) | Oak (µg/g) | Fir (µg/g) | Oak (µg/g)    | Fir (µg/g) |
| CP (average) | 7.0 ± 3      | 8.0 ± 4    | 3.3 ± 0.2  | 5.9 ± 0.03 | 7.0 ± 2       | 7.0 ± 2    |
| Experiment 1 | 5.9          | 5.9        | 9.1        | <LOD       | 4.7           | <LOD       |
| Experiment 2 | 6.0          | 6.0        | 9.3        | 8.9        | 8.9           | <LOD       |
| Experiment 3 | 6.0          | 5.9        | <LOD       | <LOD       | <LOD          | <LOD       |



|              |     |      |      |      |     |      |
|--------------|-----|------|------|------|-----|------|
| Experiment 4 | 6.0 | 5.9  | 12.0 | <LOD | 8.9 | <LOD |
| Experiment 5 | 9.4 | <LOD | 9.4  | 8.9  | 6.0 | 6.0  |
| Experiment 6 | 9.0 | 9.0  | 9.3  | 8.9  | 6.2 | 6.0  |
| Experiment 7 | 6.2 | 6.0  | 8.9  | 8.9  | 8.9 | 8.9  |
| Experiment 8 | 6.3 | 5.9  | 9.1  | 8.9  | 8.9 | 9.0  |

| <b>Syringaldehyde</b> |                   |  |                   |  |                      |  |
|-----------------------|-------------------|--|-------------------|--|----------------------|--|
|                       | <b>Ethanol</b>    |  | <b>Acetone</b>    |  | <b>Ethyl lactate</b> |  |
|                       | <b>Oak (µg/g)</b> |  | <b>Oak (µg/g)</b> |  | <b>Oak (µg/g)</b>    |  |
| CP (average)          | 25.0 ± 10         |  | 35.0 ± 5          |  | 28.5 ± 0.6           |  |
| Experiment 1          | 12.4              |  | 16.5              |  | 5.6                  |  |
| Experiment 2          | 38.3              |  | 37.6              |  | 11.6                 |  |
| Experiment 3          | 5.5               |  | 6.2               |  | 4.7                  |  |
| Experiment 4          | 15.4              |  | 7.9               |  | 5.6                  |  |
| Experiment 5          | 35.3              |  | 21.9              |  | 21.9                 |  |
| Experiment 6          | 25.4              |  | 36.1              |  | 42.9                 |  |
| Experiment 7          | 48.8              |  | 14.0              |  | 16.0                 |  |
| Experiment 8          | 22.7              |  | 31.7              |  | 36.5                 |  |

| <b>Syringic acid</b> |                   |  |                   |  |                      |  |
|----------------------|-------------------|--|-------------------|--|----------------------|--|
|                      | <b>Ethanol</b>    |  | <b>Acetone</b>    |  | <b>Ethyl lactate</b> |  |
|                      | <b>Oak (µg/g)</b> |  | <b>Oak (µg/g)</b> |  | <b>Oak (µg/g)</b>    |  |
| CP (average)         | 25.0 ± 1          |  | 35.0 ± 5          |  | 76.0 ± 2             |  |
| Experiment 1         | 5.3               |  | 14.6              |  | 7.6                  |  |
| Experiment 2         | 44.3              |  | 18.2              |  | 16.4                 |  |
| Experiment 3         | 8.7               |  | <LOD              |  | 4.2                  |  |
| Experiment 4         | 22.2              |  | <LOD              |  | 5.0                  |  |
| Experiment 5         | 48.2              |  | 31.1              |  | 24.2                 |  |
| Experiment 6         | 43.4              |  | 23.2              |  | 28.9                 |  |
| Experiment 7         | 28.0              |  | 7.7               |  | 17.8                 |  |
| Experiment 8         | 65.8              |  | 17.1              |  | 19.4                 |  |

| <b>Sinapaldehyde</b> |                   |  |                   |  |                      |  |
|----------------------|-------------------|--|-------------------|--|----------------------|--|
|                      | <b>Ethanol</b>    |  | <b>Acetone</b>    |  | <b>Ethyl lactate</b> |  |
|                      | <b>Oak (µg/g)</b> |  | <b>Oak (µg/g)</b> |  | <b>Oak (µg/g)</b>    |  |
| CP (average)         | 12.1 ± 0.1        |  | 9.2 ± 0.9         |  | 8.0 ± 2              |  |
| Experiment 1         | 5.3               |  | 7.9               |  | 6.6                  |  |
| Experiment 2         | 10.4              |  | 12.1              |  | <LOD                 |  |
| Experiment 3         | 5.0               |  | 8.8               |  | <LOD                 |  |
| Experiment 4         | 7.3               |  | 8.9               |  | <LOD                 |  |
| Experiment 5         | 15.8              |  | 11.9              |  | 8.3                  |  |
| Experiment 6         | 11.1              |  | 14.1              |  | 11.2                 |  |
| Experiment 7         | 14.1              |  | 7.4               |  | 7.5                  |  |
| Experiment 8         | 8.5               |  | 11.9              |  | 7.5                  |  |

**Figure S2.** Coefficient plots and respective contour plots showing the influence of the investigated factors on the sinapaldehyde concentration ( $\mu\text{g/g}$ ) of oak and fir wood.

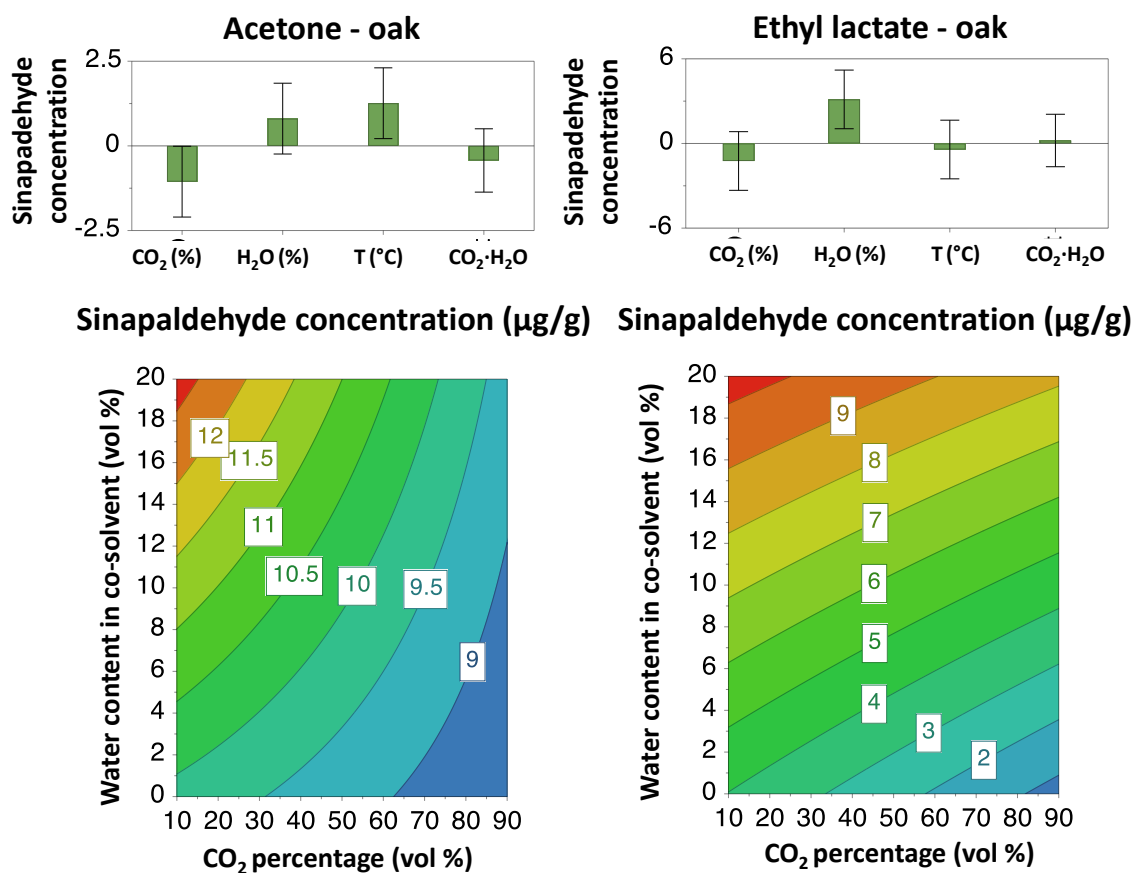

*Figure S2 - Coefficient plots from the interaction model with a full factorial design showing the influence of the investigated factors and two-factor interactions on the sinapaldehyde concentration and contour plots showing the influence of the  $\text{CO}_2$  percentage and water content in the co-solvent on the sinapaldehyde concentration of oak wood using acetone and ethyl lactate as co-solvent.  $\text{CO}_2$  (%):  $\text{CO}_2$  percentage;  $\text{H}_2\text{O}$  (%): water content in co-solvent. Temperature was  $60^\circ\text{C}$  and pressure 350 bar.*

**Figure S3.** Base peak ion chromatogram of the lignin extracted from oak wood obtained with UHPSFC/ESI-HRMS.

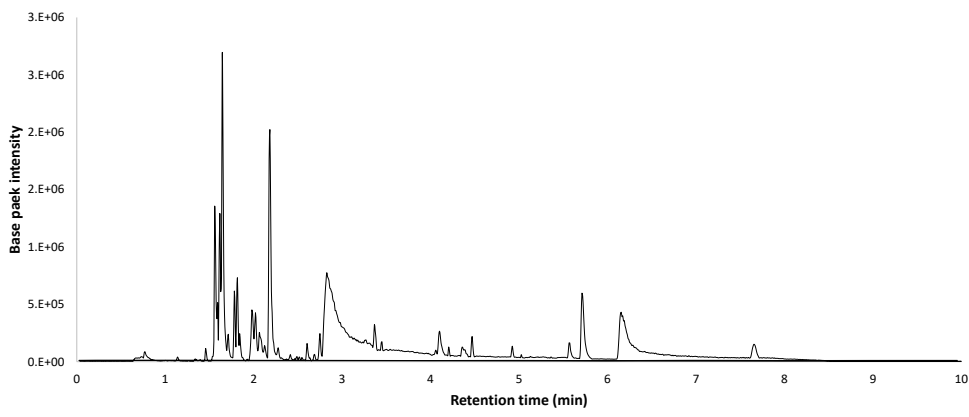

**Figure S4.** Loading plot of the KMD-PCA-QDA classification model for lignin dimers showing the latent variables (LVs) 1 and 3. #C = number of carbon atoms, #H = number of hydrogen atoms, #O = number of oxygen atoms.

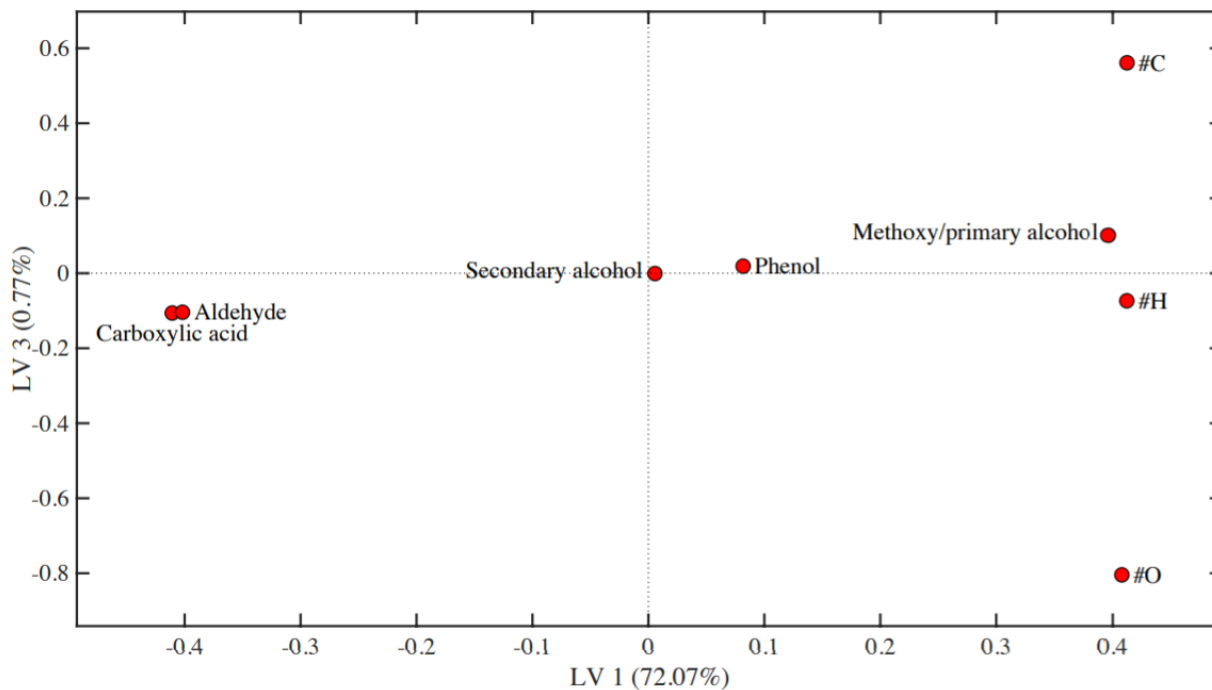

Supplement: d3ra01873c1.pdf [file d3ra01873c1.pdf]
